# Supplementary material for: Simple and efficient conversion of cellulose to γ-valerolactone through an integrated alcoholysis/transfer hydrogenation system using Ru and aluminium sulfate catalysts
Source: Royal Society of Chemistry journal article supplement (doi:10.1039/c8cy01971a), 2018-01-01
Supplement: c8cy01971a1.pdf [file c8cy01971a1.pdf]

## Supporting information

### Synthesis procedures

#### Synthesis of IPL

The synthesis of i-propyl levulinate was according to previous literature.<sup>[1]</sup> 0.1 mL H<sub>2</sub>SO<sub>4</sub> was added into a mixture of levulinic acid (0.58 g, 5 mmol), and i-propanol (0.75 g, 12.5 mmol) in toluene (15 mL) under reflux. After refluxing the mixture for 4 h, the mixture was cooled to room temperature. Subsequently, the mixture was added into 20 mL dichloromethane and washed twice with 10 mL water. The combined organic extracts were dried over MgSO<sub>4</sub>, filtered, and concentrated with vacuum distillation at 70 °C to yield 2-propyl levulinate as a yellowish liquid. The yield was determined by using H-NMR method with DMSO as internal standard. The purity of the product was analyzed by H-NMR analysis and used to calculate the correction factor with reaction standard for GC analysis (Figure S4).

#### Synthesis of IPMF.

1 mmol 5-hydroxymethylfurfural and 5 mL 2-propanol were charged into a 35 mL glass reaction tube with 0.2 mmol H<sub>2</sub>SO<sub>4</sub>. The mixture was stirred and heated to 110 °C for 2 h. After that, the mixture was evaporated at 60 °C and residues was extracted with dichloromethane (2 × 10 mL). The extract was then concentrated at 40 °C to yield AMF as a brown liquid (64.1%). The purity of the product was analyzed by H-NMR analysis and used to calculate the correction factor with reaction standard for GC analysis (Figure S5).

<sup>[1]</sup>C. H. Kuo et al., Heterogeneous acidic TiO<sub>2</sub> nanoparticles for efficient conversion of biomass derived carbohydrates. *Green Chemistry.*, **2014**, 16, 785.

**Table S1** Conversion of methyl levulinate via different CTH catalysts

| Entry | Catalyst                             | Conversion (%) | GVL (%) |
|-------|--------------------------------------|----------------|---------|
| 1     | 5% Ru/Al <sub>2</sub> O <sub>3</sub> | 100            | 94.3    |
| 2     | 5% Ru/TiO <sub>2</sub>               | 100            | 98.9    |
| 3     | 5% Ru/ZrO <sub>2</sub>               | 100            | 98.5    |
| 4     | 5% Ru/CeO <sub>2</sub>               | 95.1           | 91.4    |
| 5     | 5% Ru/AC                             | 100            | 96.6    |
| 6     | 5% Ni/ZrO <sub>2</sub>               | 25.6           | 21.7    |
| 7     | 5% Pt/ZrO <sub>2</sub>               | 100            | 94.1    |
| 8     | 5% Pd/ZrO <sub>2</sub>               | 95.7           | 89.5    |

Reaction conditions: methyl levulinate 3 mmol, 100 mg Ru/ZrO<sub>2</sub>, 14 mL i-PrOH, 800 W, 180 °C, 40 min.

**Table S2** Conversion of methyl levulinate with extra H<sub>2</sub>SO<sub>4</sub>.

| Entry | Catalyst                             | Conversion (%) | GVL (%) |
|-------|--------------------------------------|----------------|---------|
| 1     | 5% Ru/Al <sub>2</sub> O <sub>3</sub> | 60.0           | 34.1    |
| 2     | 5% Ru/TiO <sub>2</sub>               | 93.7           | 91.0    |
| 3     | 5% Ru/ZrO <sub>2</sub>               | 94.9           | 93.1    |
| 4     | 5% Ru/CeO <sub>2</sub>               | 55.3           | 33.9    |
| 5     | 5% Ru/AC                             | 47.2           | 27.5    |
| 6     | 5% Ni/ZrO <sub>2</sub>               | 25.6           | 21.7    |
| 7     | 5% Pt/ZrO <sub>2</sub>               | 95.9           | 92.1    |
| 8     | 5% Pd/ZrO <sub>2</sub>               | 92.8           | 85.6    |

Reaction conditions: methyl levulinate 3 mmol, 100 mg Ru/ZrO<sub>2</sub>, 0.8mmol H<sub>2</sub>SO<sub>4</sub>, 14 mL i-PrOH, 800 W, 180 °C, 40 min.

**Table S3** Conversion of methyl levulinate with extra H<sub>2</sub>O

| Entry | Catalyst                             | Conversion (%) | GVL (%) |
|-------|--------------------------------------|----------------|---------|
| 1     | 5% Ru/Al <sub>2</sub> O <sub>3</sub> | 100            | 92.7    |
| 2     | 5% Ru/TiO <sub>2</sub>               | 100            | 96.6    |
| 3     | 5% Ru/ZrO <sub>2</sub>               | 100            | 97.1    |
| 4     | 5% Ru/CeO <sub>2</sub>               | 100            | 88.9    |
| 5     | 5% Ru/AC                             | 100            | 92.5    |
| 6     | 5% Ni/ZrO <sub>2</sub>               | 21.6           | 15.2    |
| 7     | 5% Pt/ZrO <sub>2</sub>               | 73.9           | 43.4    |
| 8     | 5% Pd/ZrO <sub>2</sub>               | 32.8           | 15.6    |

Reaction condition: 3 mmol Methyl levulinate, 100 mg Ru/ZrO<sub>2</sub>, 14 mL i-PrOH, 0.6 mL H<sub>2</sub>O, 800 W, 180 °C,.

**Table S4** Influence of reaction temperature on the product distribution.

| Temp. (°C) | Time (min) | Conv. (%) | Product yields (%) |      |      |         |      |
|------------|------------|-----------|--------------------|------|------|---------|------|
|            |            |           | GVL                | IPL  | IPMF | Glucose | IPGP |
| 170        | 20         | 7.3       | 0.2                | 0.7  | 0.8  | 3.4     | 1.8  |
|            | 40         | 34.3      | 3.9                | 4.5  | 2.5  | 11.7    | 6.4  |
|            | 60         | 74.1      | 11.8               | 8.7  | 4.2  | 22.1    | 11.9 |
|            | 80         | 99.7      | 20.8               | 9.1  | 3.9  | 23.2    | 11.4 |
|            | 100        | 100       | 38.5               | 4.8  | 3.0  | 6.8     | 3.4  |
|            | 120        | 100       | 45.9               | 0.4  | 0.2  | 0       | 0    |
|            | 130        | 100       | 43.7               | 0    | 0    | 0       | 0    |
| 180        | 10         | 45.3      | 3.4                | 4.1  | 2.8  | 16.2    | 9.7  |
|            | 20         | 73.1      | 12.9               | 7.2  | 3.8  | 22.4    | 11.5 |
|            | 30         | 95.1      | 22.4               | 9.5  | 4.7  | 24.1    | 14.2 |
|            | 40         | 100       | 34.7               | 10.4 | 3.0  | 16.2    | 9.2  |
|            | 50         | 100       | 42.1               | 7.4  | 1.5  | 7.5     | 4.5  |
|            | 60         | 100       | 48.4               | 4.5  | 0.4  | 1.4     | 1.2  |

|     |    |      |      |     |     |      |     |
|-----|----|------|------|-----|-----|------|-----|
|     | 70 | 100  | 51.2 | 0.2 | 0   | 0.1  | 0.6 |
|     | 80 | 100  | 49.7 | 0   | 0   | 0    | 0   |
| 190 | 10 | 65.2 | 14.2 | 5.1 | 2.8 | 17.2 | 8.4 |
|     | 20 | 93.1 | 25.1 | 6.2 | 3.7 | 18.1 | 7.4 |
|     | 30 | 100  | 31.9 | 4.9 | 1.4 | 5.4  | 2.6 |
|     | 40 | 100  | 39.5 | 2.1 | 1.1 | 0.5  | 0.9 |
|     | 50 | 100  | 41.9 | 0.2 | 0   | 0    | 0   |
|     | 60 | 100  | 33.7 | 0   | 0   | 0    | 0   |

Reaction condition: 3 mmol cellulose, 0.8 mmol  $\text{Al}_2(\text{SO}_4)_3$ , 100 mg Ru/ZrO<sub>2</sub>, 0.6 mL H<sub>2</sub>O, 14 mL 2-PrOH, 800 W. IPGP was calculated by using methyl  $\alpha$ -D-glucopyranoside as substitute.

**Table S5.** Influence of water content on GVL production from cellulose<sup>a</sup>

| Entry | Water content (mL) | IPL (%) | GVL (%) |
|-------|--------------------|---------|---------|
| 1     | 0                  | 0       | 29.7    |
| 2     | 0.2                | 0       | 40.4    |
| 3     | 0.4                | 0.2     | 47.9    |
| 4     | 0.6                | 0.2     | 51.2    |
| 5     | 0.8                | 1.3     | 46.1    |

<sup>a</sup>Reaction Conditions: cellulose 3 mmol,  $\text{Al}_2(\text{SO}_4)_3$  0.8 mmol, Ru/ZrO<sub>2</sub> 100 mg, i-PrOH 14 mL, 800 W, 180 °C, 70 min.

**Table S6.** GVL production from xylan<sup>a</sup>

| Entry | substrate | IPL (%) | GVL (%) |
|-------|-----------|---------|---------|
| 1     | xylan     | 0       | 13.3    |
| 2     | xylan     | 0       | 15.2    |

<sup>a</sup>Reaction Conditions: xylan 3 mmol,  $\text{Al}_2(\text{SO}_4)_3$  0.8 mmol, Ru/ZrO<sub>2</sub> 100 mg, i-PrOH 14 mL, 0.6 mL H<sub>2</sub>O, 800 W, 180 °C, 70 min.

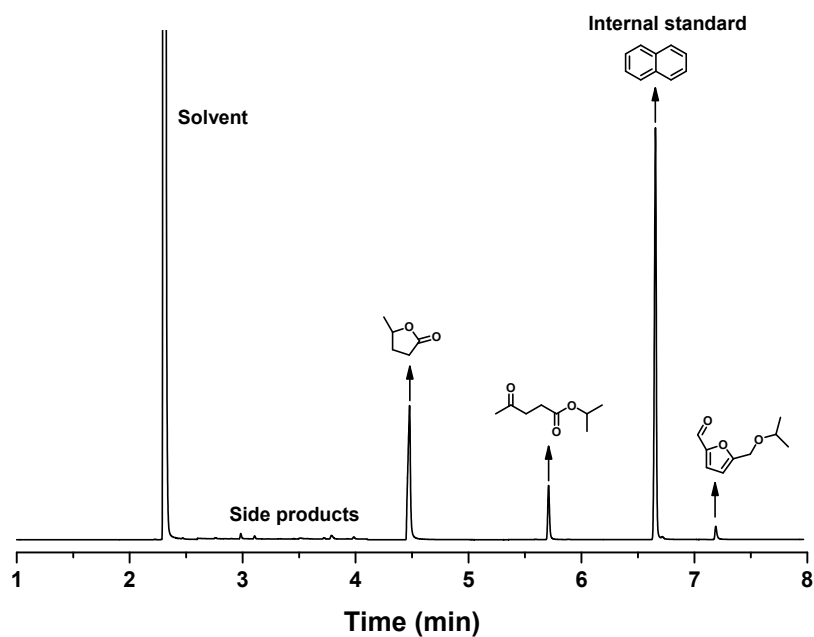

**Figure S1.** GC analysis of the cellulose conversion at 40 min reaction time. Condition: 3 mmol cellulose, 0.8 mmol  $\text{Al}_2(\text{SO}_4)_3$ , 100 mg Ru/ZrO<sub>2</sub>, 0.6 mL H<sub>2</sub>O, 14 mL 2-PrOH, 800 W, 180 °C, 40 min.

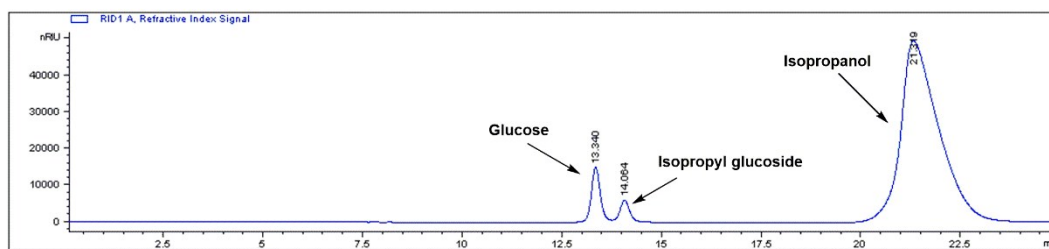

**Figure S2.** Typical HPLC chromatogram of the reaction mixture of cellulose conversion. Condition: 3 mmol cellulose, 0.8 mmol  $\text{Al}_2(\text{SO}_4)_3$ , 100 mg Ru/ZrO<sub>2</sub>, 0.6 mL H<sub>2</sub>O, 14 mL 2-PrOH, 800 W, 180 °C, 40 min.

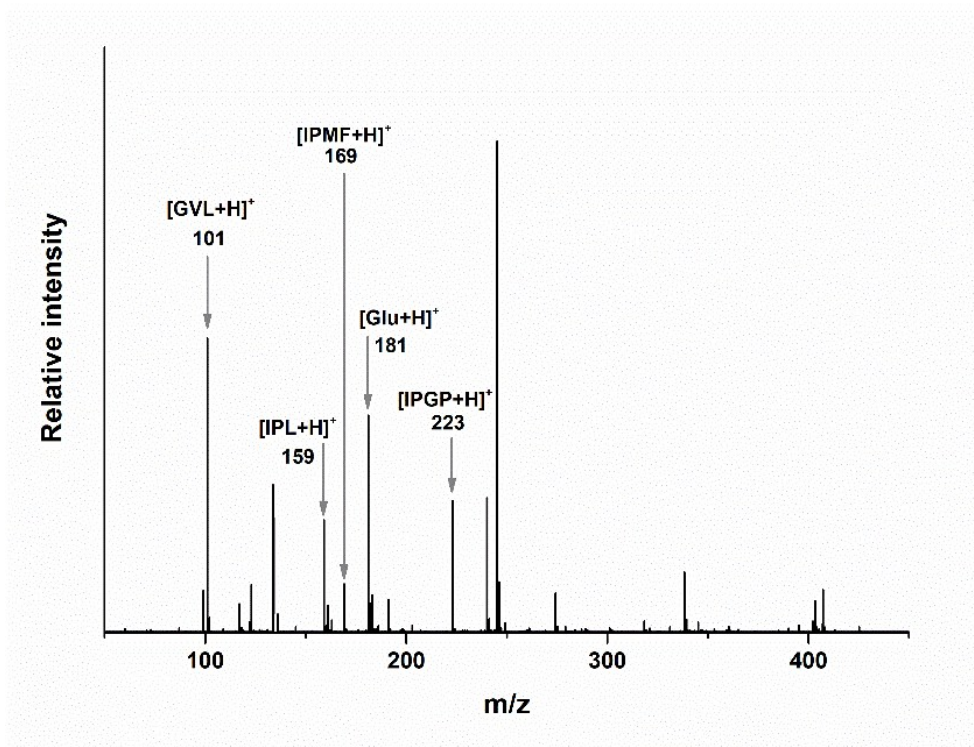

**Figure S3.** Electron spin ionization–mass spectroscopy (ESI-MS) spectra of reaction mixture in positive mode. Condition: 3 mmol cellulose, 0.8 mmol  $\text{Al}_2(\text{SO}_4)_3$ , 100 mg Ru/ZrO<sub>2</sub>, 0.6 mL H<sub>2</sub>O, 14 mL i-PrOH, 800 W, 180 °C, 40 min. The reaction mixture was diluted with 50 mL water before analysis.

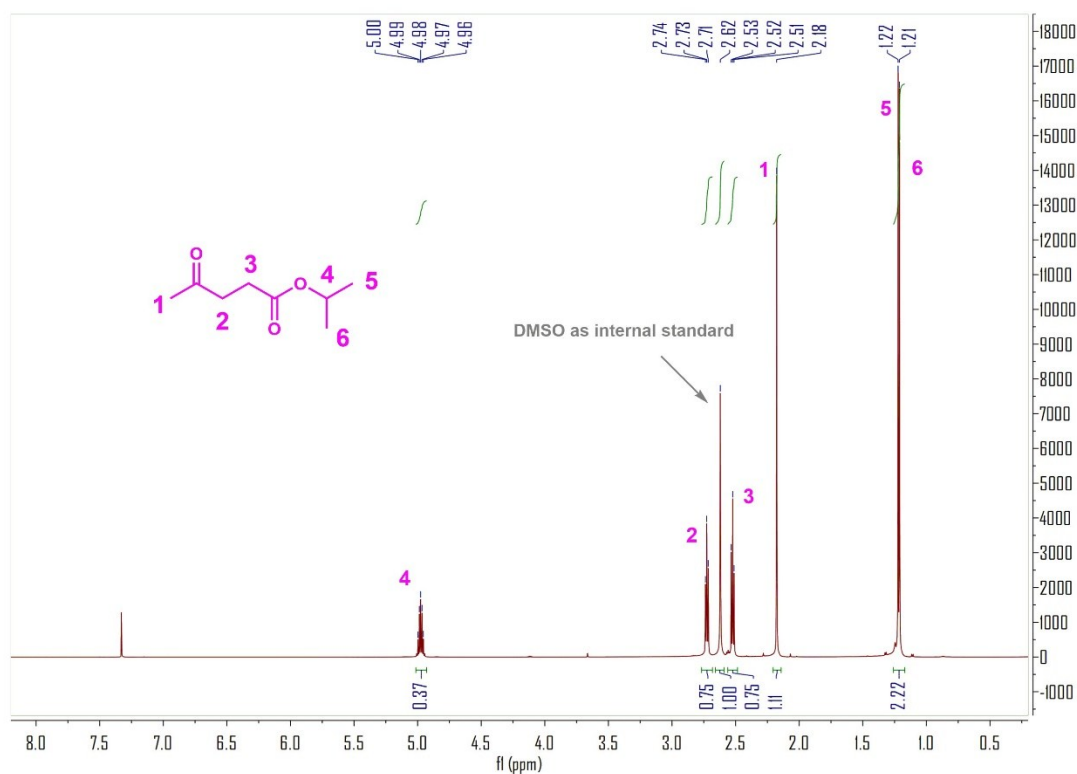

**Figure S4.** Representative <sup>1</sup>H-NMR spectrum of intermediates IPL in chloroform-d.

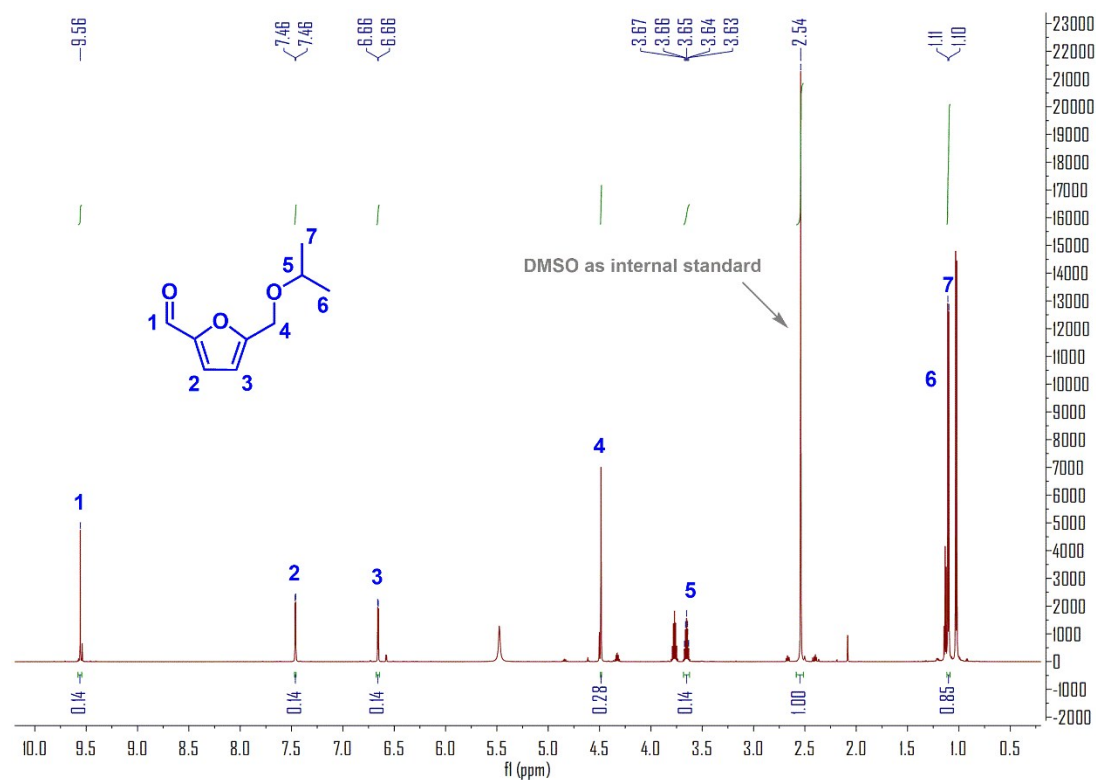

**Figure S5.** Representative  $^1\text{H-NMR}$  spectrum of intermediates IPMF in dimethyl sulfoxide- $d_6$ .

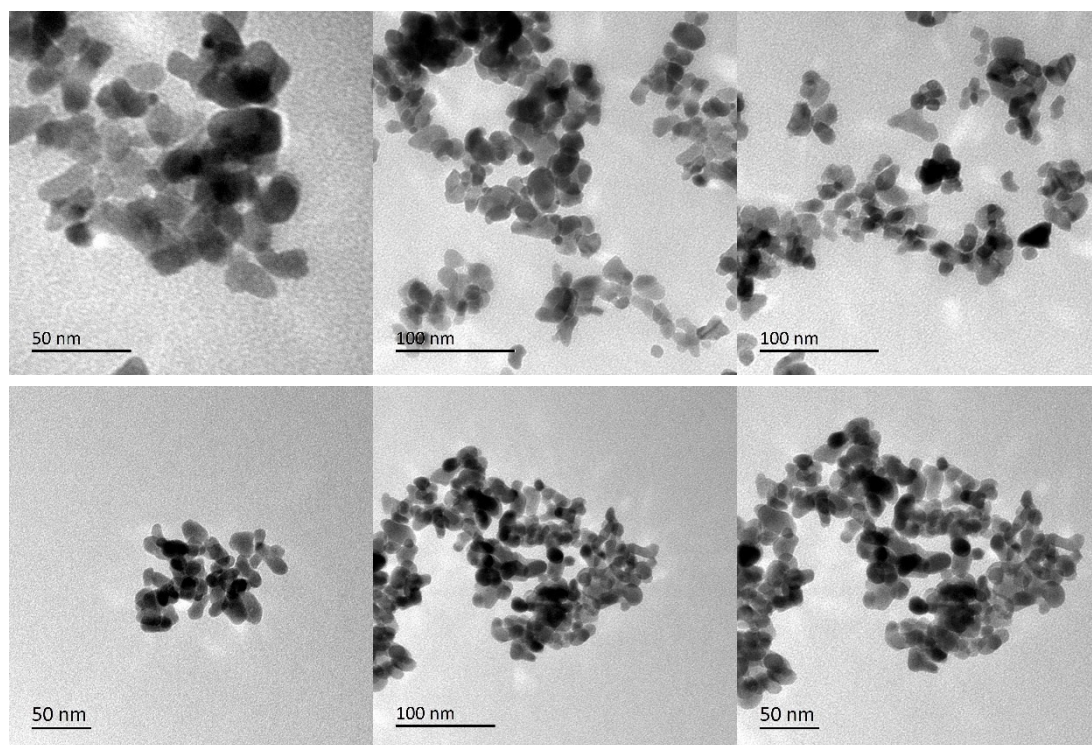

**Figure S6** TEM of the fresh (above) and spent Ru/ZrO<sub>2</sub> catalyst (bottom).

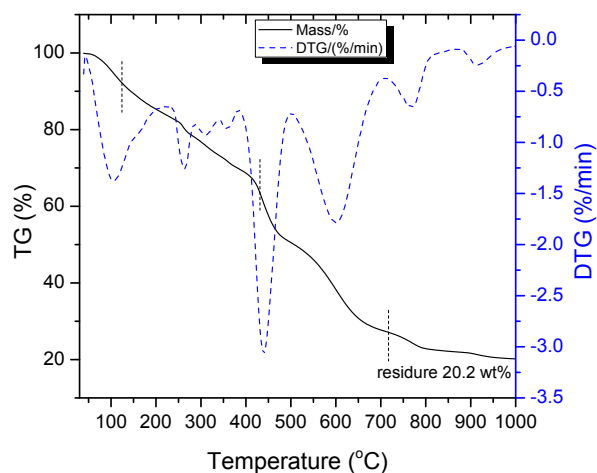

**Figure S7.** TGA curves of the recovered metal salt catalyst. The remaining weight percentage was 20.2%. Proposed catalyst formulas were  $2\text{Al}(\text{OH})_2(\text{H}_2\text{O})_4 + 3\text{H}_2\text{SO}_4$  ( $M_w=533$ ) and the final residue was  $\text{Al}_2\text{O}_3$  ( $M_w=102$ ). Theoretical residue weight percentage was  $102/533 \times 100\% = 19.1\%$ .
